# Supplementary material for: Prognostic role of tumour-infiltrating lymphocytes assessed by H&E-stained section in gastric cancer: a systematic review and meta-analysis
Source: HighWire-hosted journal article supplement (doi:10.1136/bmjopen-2020-044163), 2021-01-01
Supplement: bmjopen-2020-044163supp001_data_supplement.pdf [file bmjopen-2020-044163supp001_data_supplement.pdf]

Supplementary Table S1: The electronic search strategy for PubMed

|                                                                                                                                                                                                                                                                                                                                                                                                                                 |
|---------------------------------------------------------------------------------------------------------------------------------------------------------------------------------------------------------------------------------------------------------------------------------------------------------------------------------------------------------------------------------------------------------------------------------|
| Search terms                                                                                                                                                                                                                                                                                                                                                                                                                    |
| 1. "Stomach Neoplasms"[MeSH]                                                                                                                                                                                                                                                                                                                                                                                                    |
| 2. (((((((((((((((((Neoplasm, Stomach) OR Stomach Neoplasm) OR Neoplasms, Stomach) OR Gastric Neoplasms) OR Gastric Neoplasm) OR Neoplasm, Gastric) OR Neoplasms, Gastric) OR Cancer of Stomach) OR Stomach Cancers) OR Gastric Cancer) OR Cancer, Gastric) OR Cancers, Gastric) OR Gastric Cancers) OR Stomach Cancer) OR Cancer, Stomach) OR Cancers, Stomach) OR Cancer of the Stomach) OR Gastric Cancer, Familial Diffuse) |
| 3. 1 or 2                                                                                                                                                                                                                                                                                                                                                                                                                       |
| 4. "lymphocytes, tumor infiltrating"[MeSH]                                                                                                                                                                                                                                                                                                                                                                                      |
| 5. (((((((((((((((((Lymphocytes, Tumor Infiltrating) OR Tumor-Infiltrating Lymphocytes) OR Lymphocyte, Tumor-Infiltrating) OR Tumor Infiltrating Lymphocytes) OR Tumor-Infiltrating Lymphocyte) OR Tumor-Derived Activated Cells) OR Activated Cell, Tumor-Derived) OR Activated Cells, Tumor-Derived) OR Tumor Derived Activated Cells) OR Tumor-Derived Activated Cell))                                                      |
| 6. 4 or 5                                                                                                                                                                                                                                                                                                                                                                                                                       |
| 7. 3 and 6                                                                                                                                                                                                                                                                                                                                                                                                                      |
