# Supplementary material for: Prognostic role of tumour-infiltrating lymphocytes assessed by H&E-stained section in gastric cancer: a systematic review and meta-analysis
Source: HighWire-hosted journal article supplement (doi:10.1136/bmjopen-2020-044163), 2021-01-01
Supplement: bmjopen-2020-044163supp002_data_supplement.pdf [file bmjopen-2020-044163supp002_data_supplement.pdf]

https://pubmed.ncbi.nlm.nih.gov/?term=%28%28%22Stomach+Neoplasms%22%5BMesh%5D%29+OR+%28%28%28%28%28%28%28%28%28%28%28%28%28%28%28%28%28%28%28%28%28Neoplasms%2C+Stomach%29+OR+%28Stomach+Neoplasm%29%29+OR+%28Neoplasms%2C+Stomach%29%29+OR+%28Gastric+Neoplasms%29%29+OR+%28Gastric+Neoplasm%29%29+OR+%28Neoplasm%2C+Gastric%29%29+OR+%28Neoplasms%2C+Gastric%29%29+OR+%28Cancer+of+Stomach%29%29+OR+%28Stomach+Cancers%29%29+OR+%28Gastric+Cancer%29%29+OR+%28Cancer%2C+Gastric%29%29+OR+%28Cancers%2C+Gastric%29%29+OR+%28Gastric+Cancers%29%29+OR+%28Stomach+Cancer%29%29+OR+%28Cancer%2C+Stomach%29%29+OR+%28Cancers%2C+Stomach%29%29+OR+%28Cancer+of+the+Stomach%29%29+OR+%28Gastric+Cancer%2C+Familial+Diffuse%29%29+AND+%28%28%22Lymphocytes%2C+Tumor-Infiltrating%22%5BMesh%5D%29+OR+%28%28%28%28%28%28%28%28%28%28%28Lymphocytes%2C+Tumor+Infiltrating%29+OR+%28Tumor-Infiltrating+Lymphocytes%29%29+OR+%28Lymphocyte%2C+Tumor-Infiltrating%29%29+OR+%28Tumor+Infiltrating+Lymphocytes%29%29+OR+%28Tumor-Infiltrating+Lymphocyte%29%29+OR+%28Tumor-Derived+Activated+Cells%29%29+OR+%28Activated+Cell%2C+Tumor-Derived%29%29+OR+%28Activated+Cells%2C+Tumor-Derived%29%29+OR+%28Tumor+Derived+Activated+Cells%29%29+OR+%28Tumor-Derived+Activated+Cell%29%29%29&sort=
